# Supplementary material for: Optimized nano-metal particles filled into carbon nanohorns to achieve high N-doping amount and high porosity for enhanced oxygen evolution reaction
Source: Royal Society of Chemistry journal article supplement (doi:10.1039/d2ra01013e), 2022-01-01
Supplement: d2ra01013e1.pdf [file d2ra01013e1.pdf]

Supporting Information for

# Optimized nano-metal particles filled into carbon nanohorns to achieve high N-doping amount and high porosity for enhanced oxygen evolution reaction

*Yanli Nan*<sup>\*</sup>, *Zhaoyu Wang*

School of Material Science and Engineering, Shaanxi Key Laboratory of Nano Materials and Technology, Xi'an University of Architecture and Technology, Xi'an 710055, China

**\*Corresponding Author.**

E-mail: [nanyl@xauat.edu.cn](mailto:nanyl@xauat.edu.cn) (YL Nan)

**Experimental Section:** The pristine CNHs was produced by the arc discharge method in Ar (0.15 MPa). The magnetic properties were measured at room temperature using a vibrating sample magnetometer (VSM, TM-VSM2014-MHR).

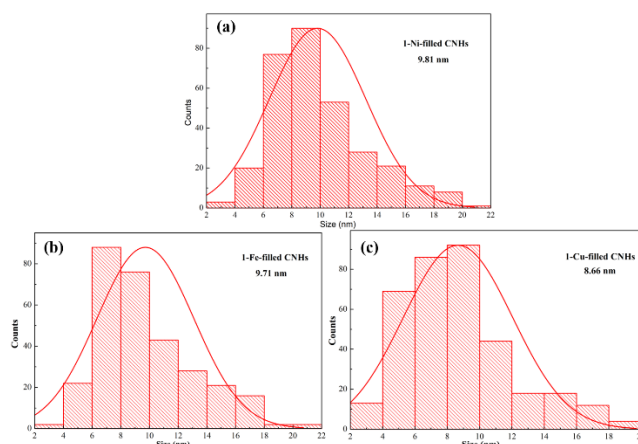

**Figure S1.** The size distribution of Ni, Fe, and Cu nanoparticles of 1-Ni-filled, 1-Fe-filled CNHs and 1-Cu-filled CNHs.

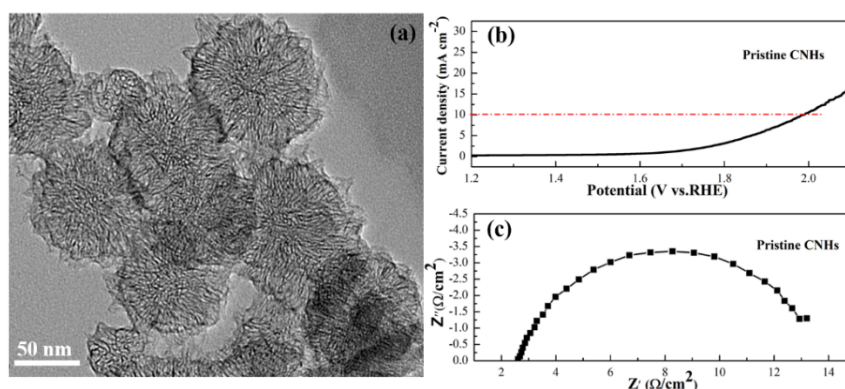

**Figure S2.** The TEM image of pristine CNHs. (b) The LSV plots of pristine CNHs at 5 mV s<sup>-1</sup> in 1 M KOH. (c). EIS spectra of pristine CNHs.

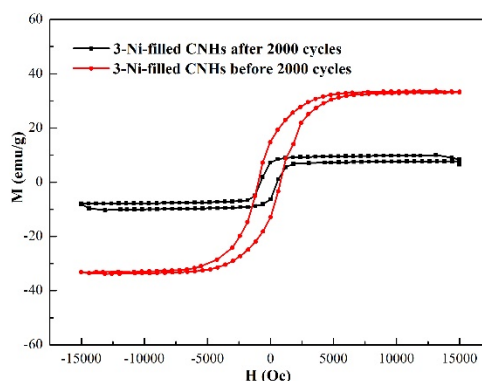

**Figure S3.** The magnetic hysteresis loops of working electrode coating with 3-Ni-filled CNHs and 3-Ni-filled CNHs after 2000 cycles at room temperature.
